**Transcription factor AP-2 $\gamma$  is essential in the extra-embryonic lineages for early postimplantation development**

Auman, H. J., Nottoli, T., Lakiza, O., Winger, Q., Donaldson, S. and Williams, T. *Development* **129**, 2733-2747.

In the printed version of this article, one of the references was listed incorrectly. The correct version is shown below.

**Peng, L. and Payne, A. H.** (2001). AP-2 $\gamma$  and the homeodomain protein distal-less are required for placental-specific expression of the murine 3 $\beta$ -hydroxysteroid dehydrogenase VIU gene. *J. Biol. Chem.* **277**, 7945-7954.
